# Supplementary material for: Estrogen inhibits colonic smooth muscle contractions by regulating BKβ1 signaling
Source: PubMed Central journal article supplement (PMC10637685; doi:10.1371/journal.pone.0294249), 2023-11-10
Supplement: pone.0294249.s002.pdf [file pone.0294249.s002.pdf]

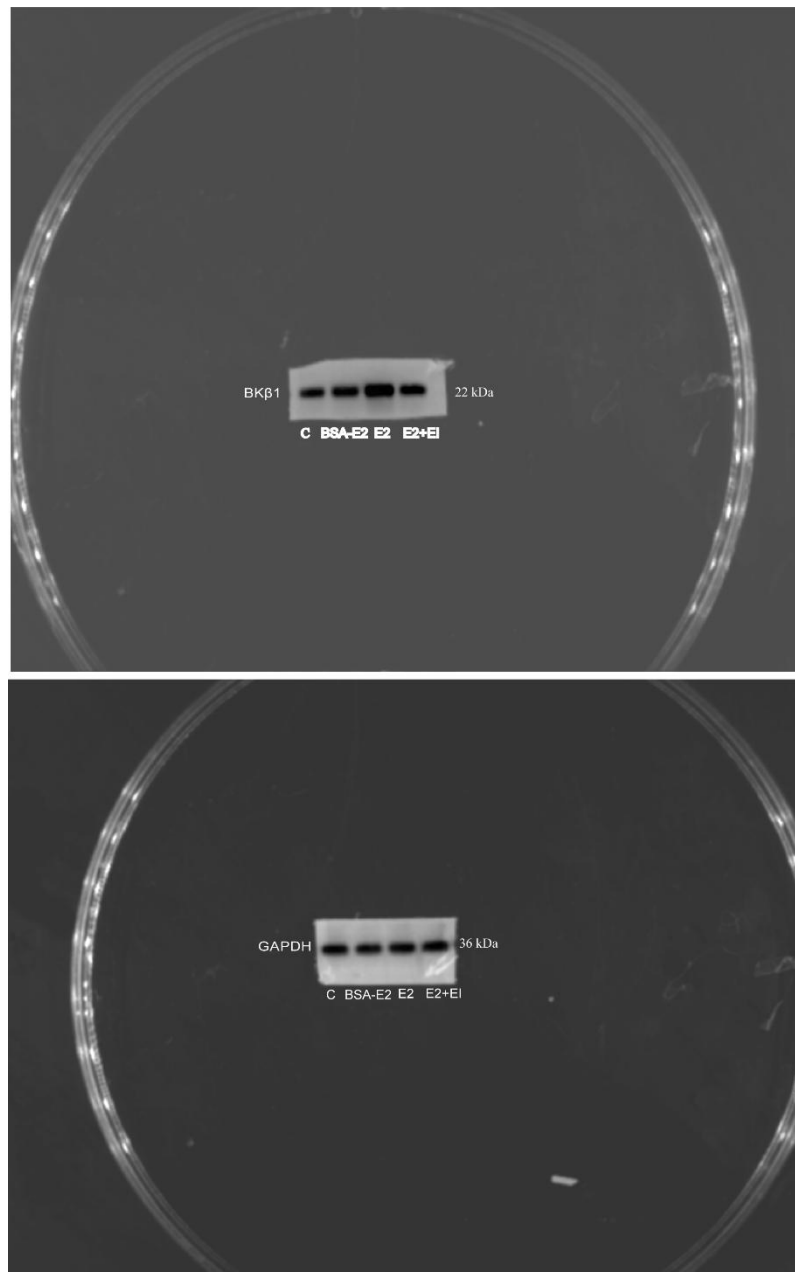

Fig2: BKβ1 expression and distribution in rat colonic smooth muscle

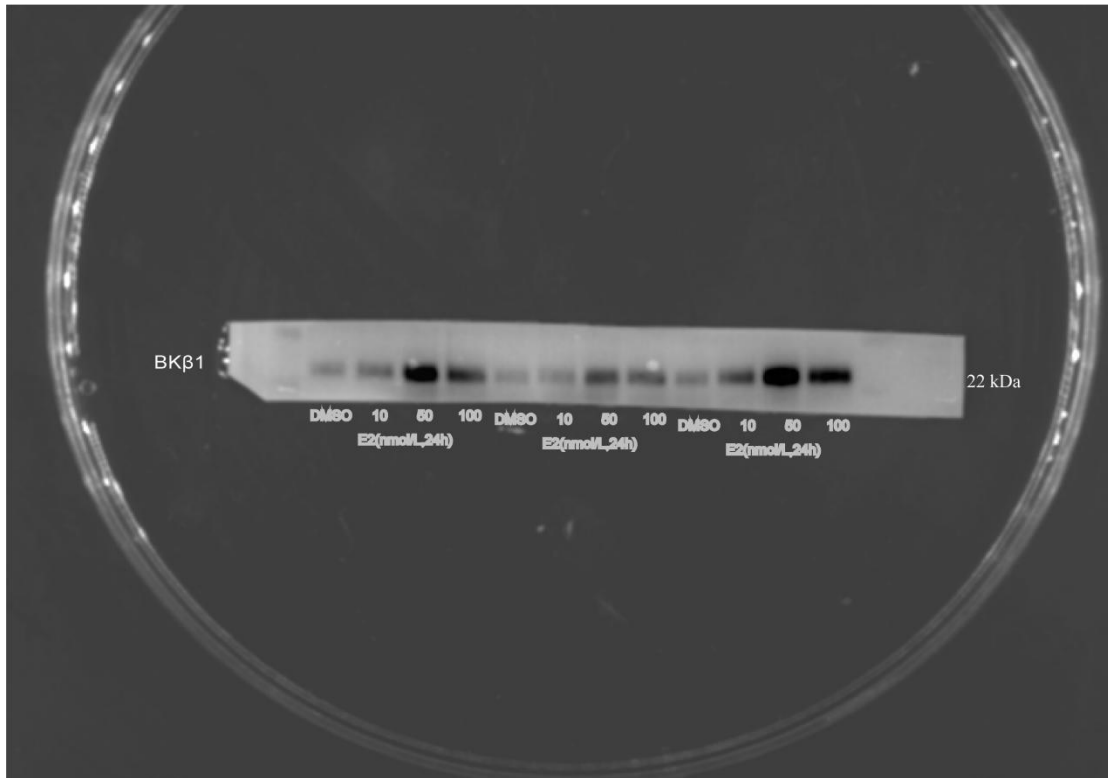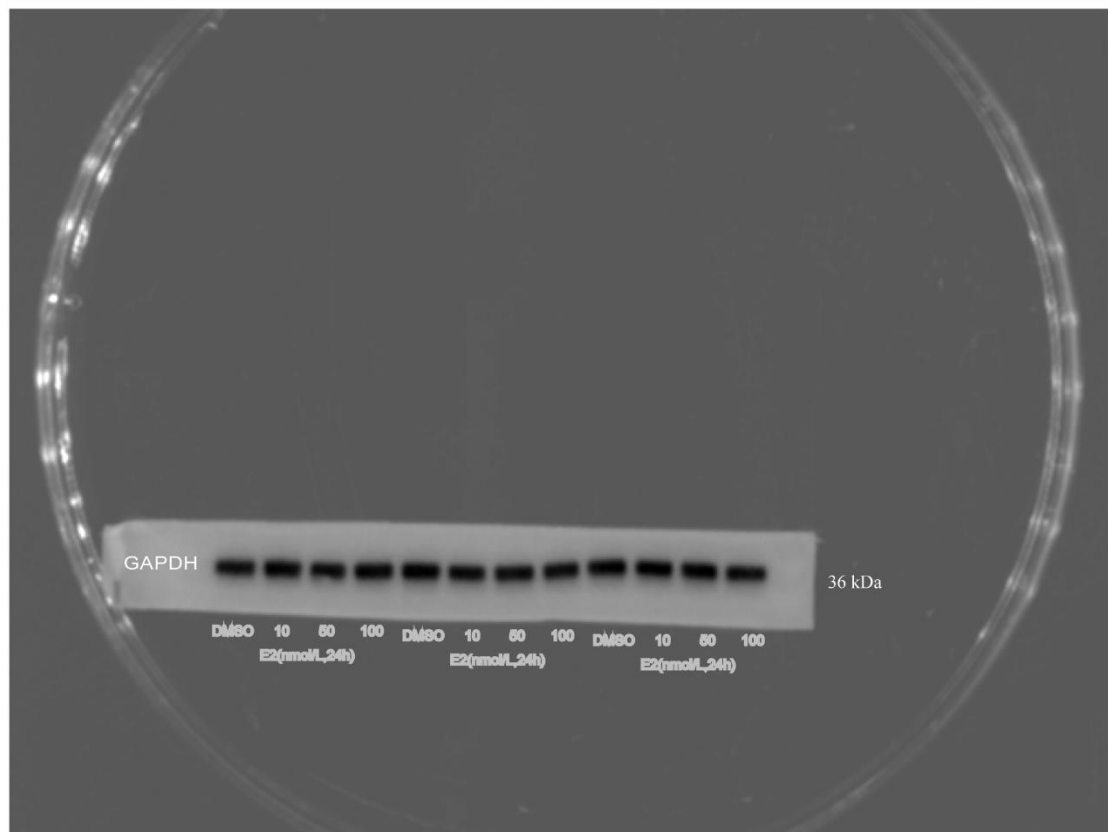

Fig3A. E2 was administered to rat CoSMCs for 24 h at 0, 10, 50, or 100 nmol/l.

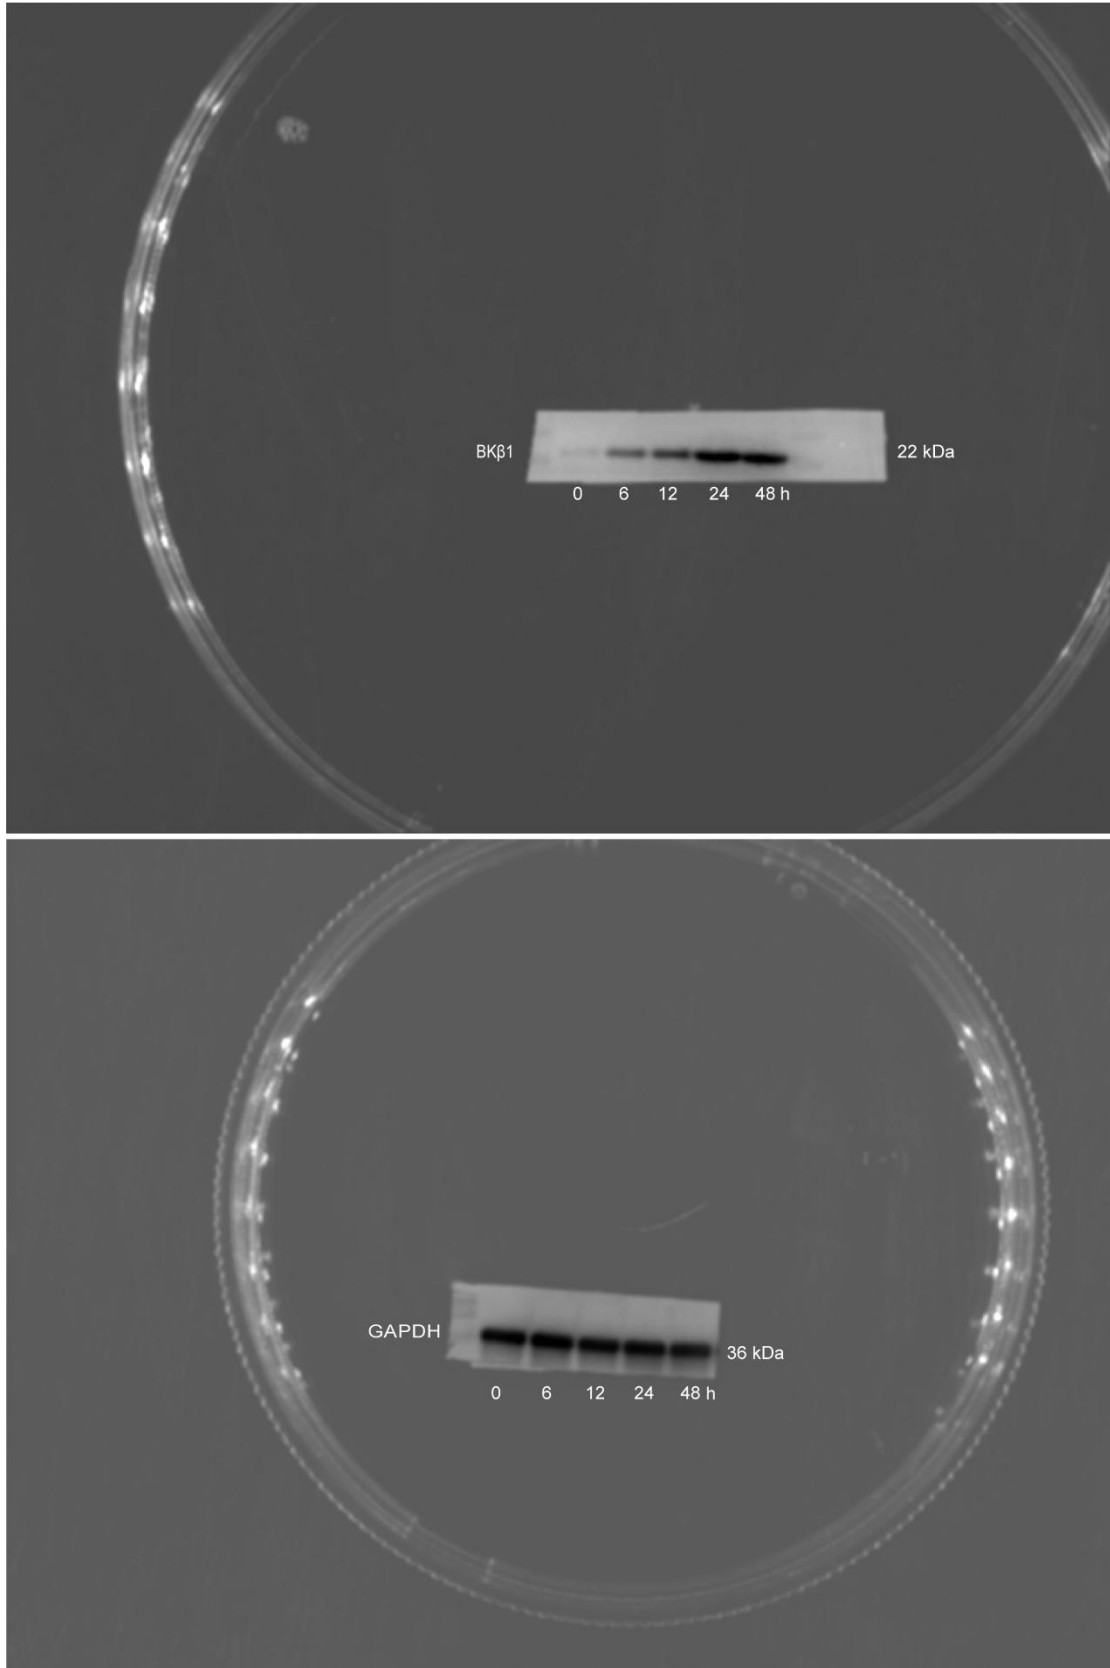

Fig3C. Rat CoSMCs were treated with 50 nmol/l of E2 for 0, 6, 12, 24 or 48 h

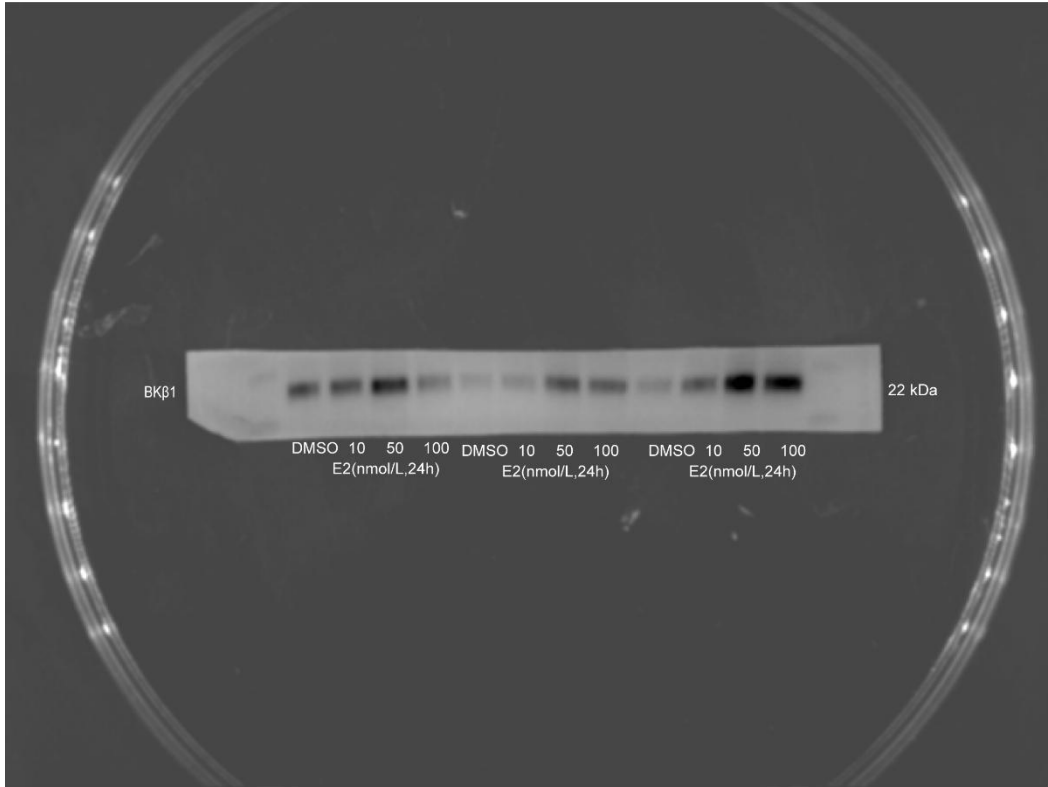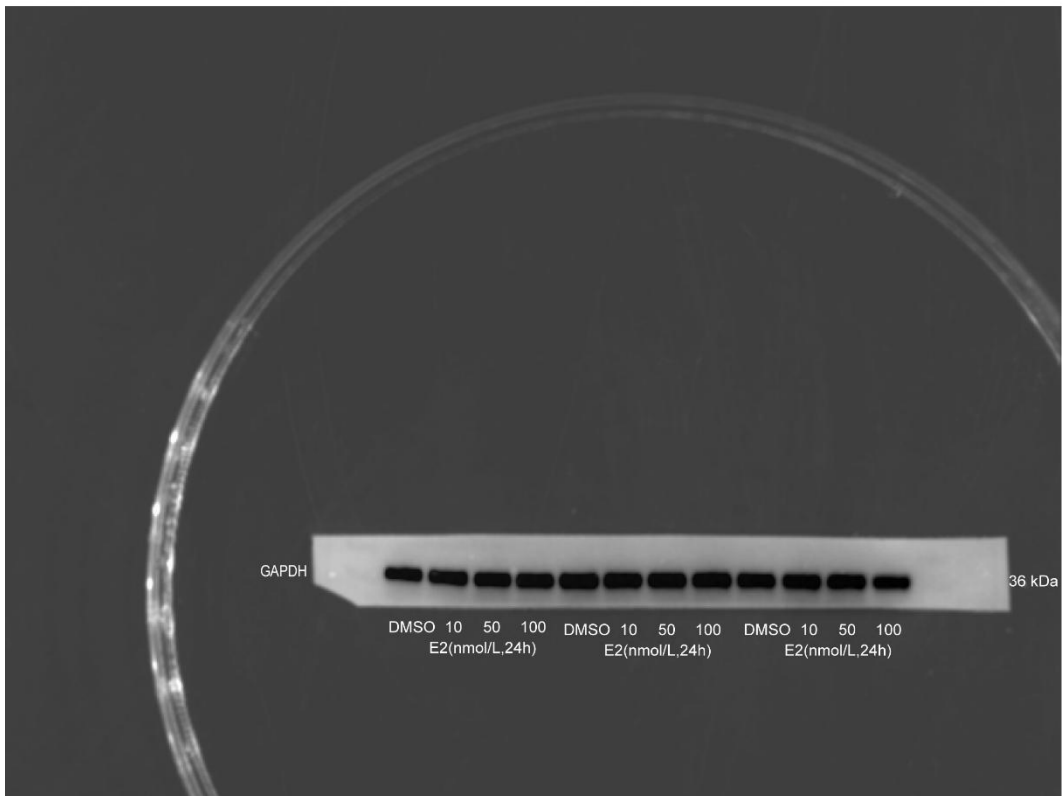

Fig3E: E2 was administered to HCoSMCs for 24 h at 0, 10, 50, or 100 nmol/l

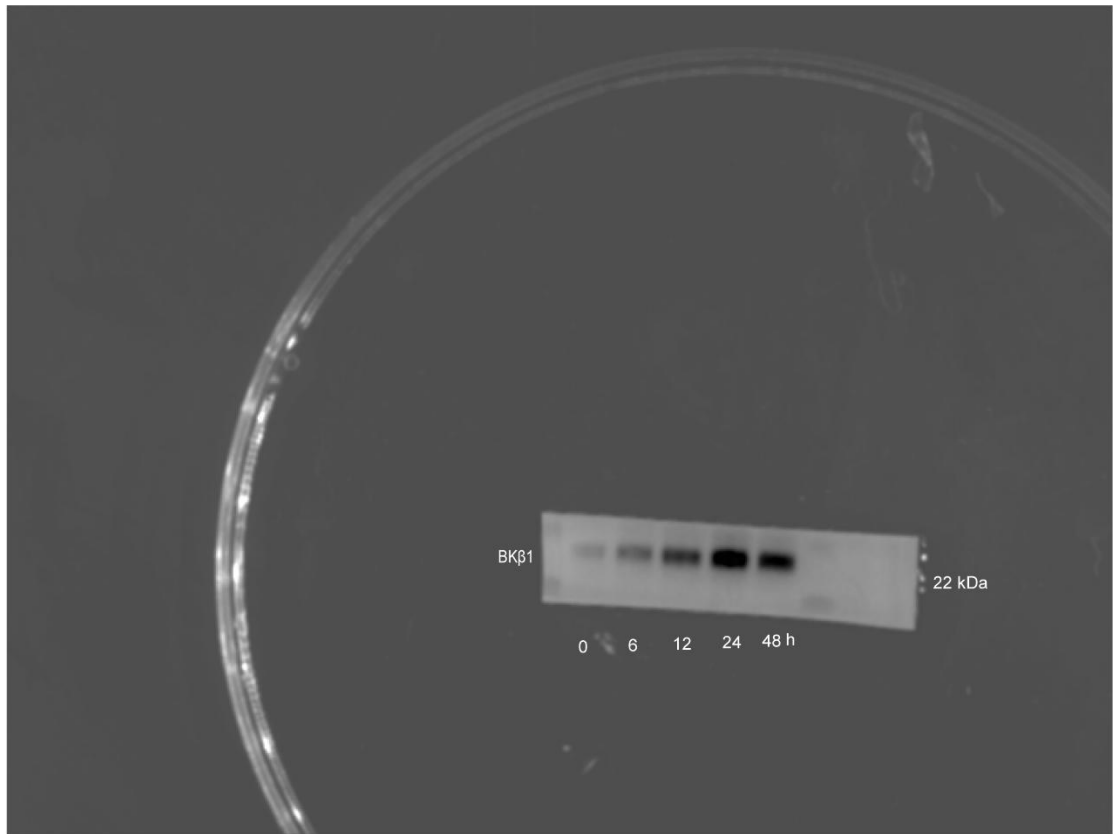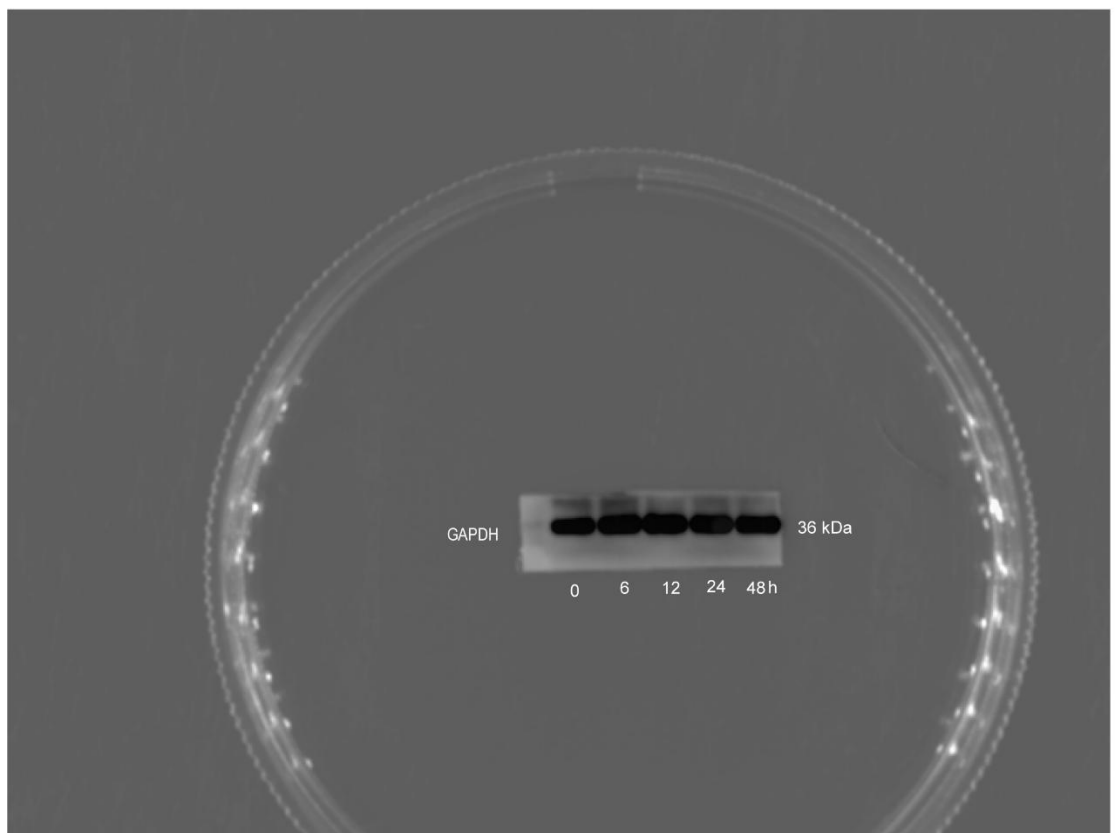

Fig3G: HCoSMCs treated with 50 nmol/l of E2 for 0, 6, 12, 24 or 48 h.

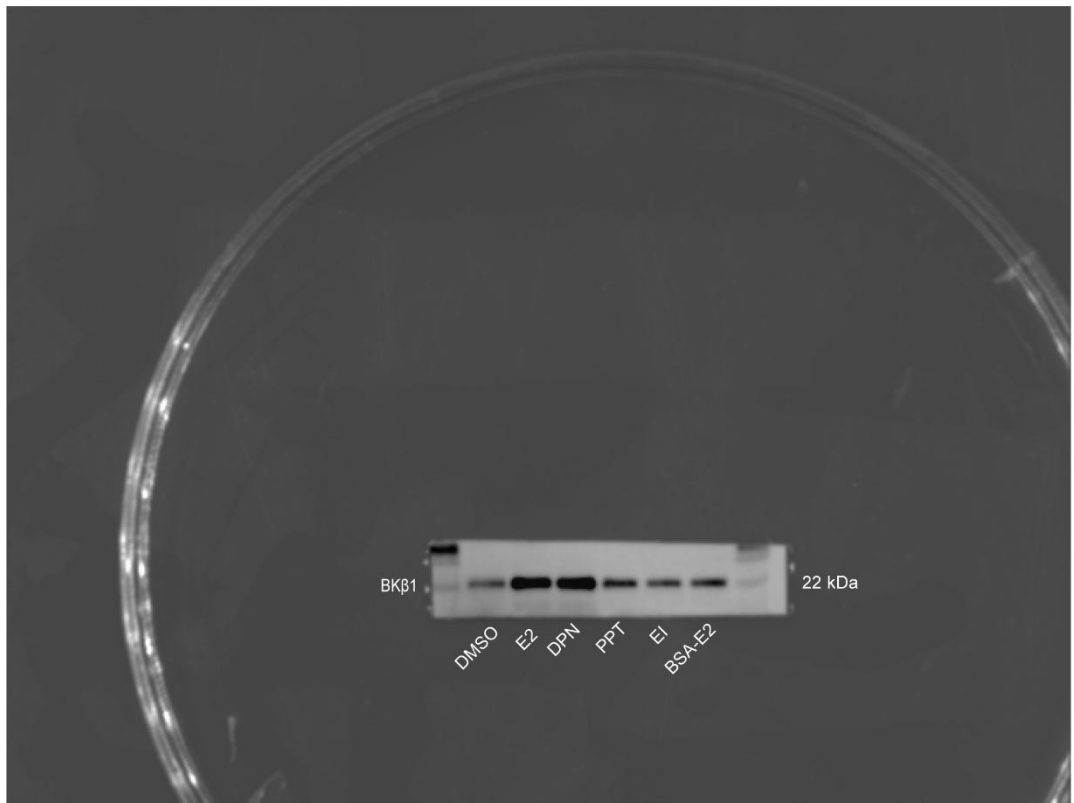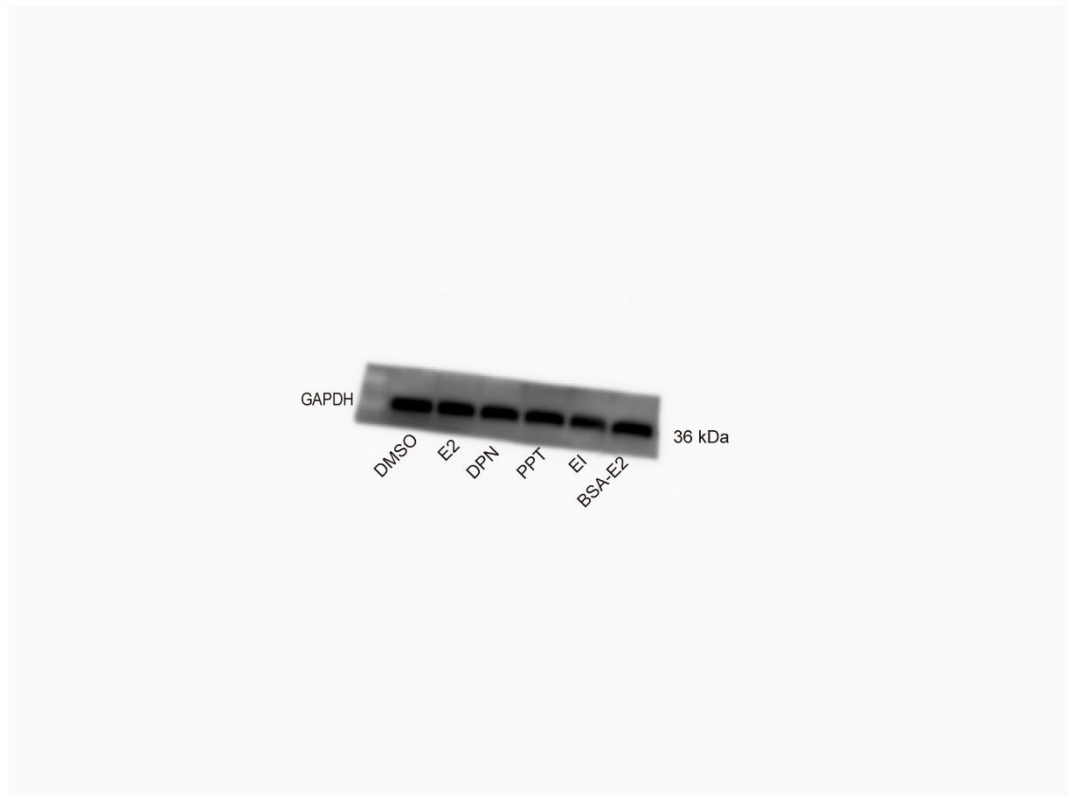

Fig4A:E2 promoted BK $\beta$ 1 expression in rat CoSMCs in an ER $\beta$ -dependent manner

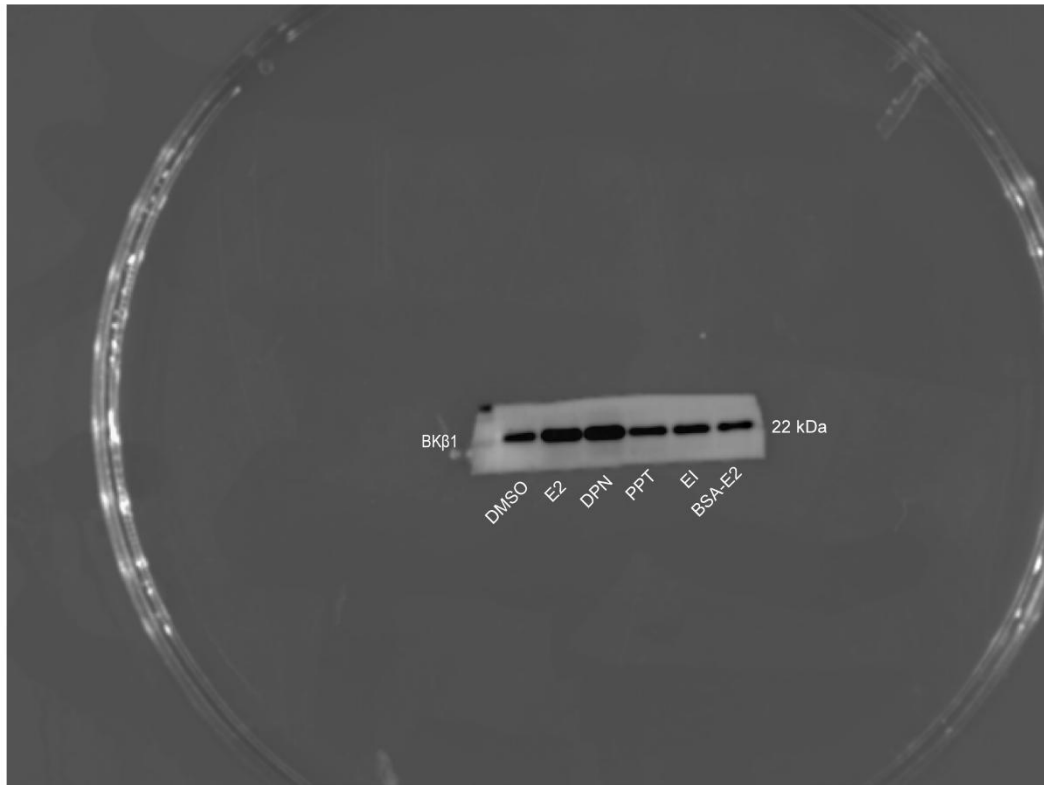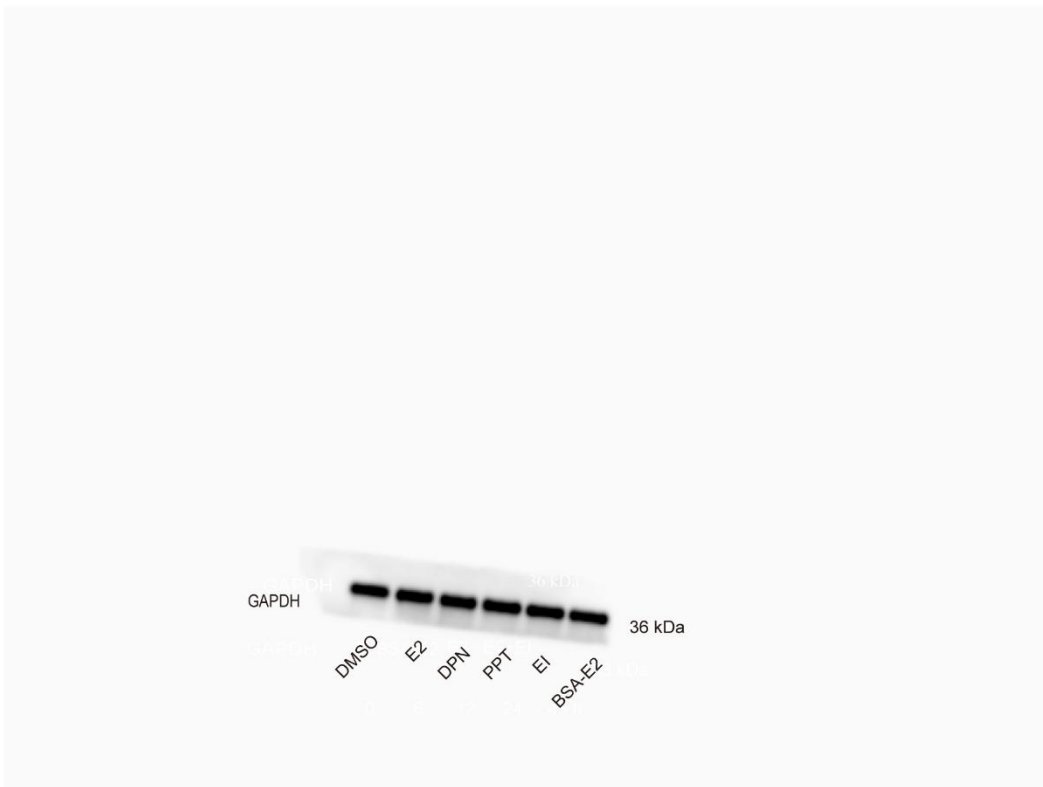

Fig4B:E2 promoted BKβ1 expression in HCoSMCs in an ERβ-dependent manner
